# Supplementary material for: Wheat Oxylipins in Response to Aphids, CO2 and Nitrogen Regimes
Source: MDPI journal article supplement (doi:10.3390/molecules28104133), 2023-05-16
Supplement: s1 [file s1]

# Supplementary Material

**Table S1.** Qualitative profile of phytoprostanes in terms of their occurrence and distribution in plant physiological part, fruits and processed plant foods.

| Plant Sample /Food                                              | 9-F <sub>1t</sub> -PhytoP | 9- <i>epi</i> -9-F <sub>1t</sub> -PhytoP | 9-D <sub>1t</sub> -PhytoP | 9- <i>epi</i> -9-D <sub>1t</sub> -PhytoP | 9-L <sub>1t</sub> -PhytoP | 16-B <sub>1t</sub> -PhytoP | <i>ent</i> -16-F <sub>1t</sub> -PhytoP + <i>ent</i> -16- <i>epi</i> -16-F <sub>1t</sub> -PhytoP | Reference         |
|-----------------------------------------------------------------|---------------------------|------------------------------------------|---------------------------|------------------------------------------|---------------------------|----------------------------|-------------------------------------------------------------------------------------------------|-------------------|
| <i>Plant Physiological Parts</i>                                |                           |                                          |                           |                                          |                           |                            |                                                                                                 |                   |
| <b>Wheat leaves</b>                                             | ✓                         | ✓                                        |                           |                                          |                           |                            | ✓                                                                                               | <b>this study</b> |
| Cucumis melo L. leaves                                          | ✓                         | ✓                                        |                           |                                          | ✓                         | ✓                          | ✓                                                                                               | [42]              |
| Date tree leaves                                                | ✓                         | ✓                                        | ✓                         | ✓                                        | ✓                         | ✓                          |                                                                                                 | [43,44]           |
| Chilean hazelnut (Gevuina avellana Mol., Proteaceae) cotyledons | ✓                         | ✓                                        | ✓                         | ✓                                        |                           | ✓                          | ✓                                                                                               | [47]              |
| Macroalgae                                                      | ✓                         | ✓                                        |                           |                                          | ✓                         | ✓                          |                                                                                                 | [45]              |
| Brown macroalgae (Ectocarpus siliculosus)                       | ✓                         | ✓                                        |                           |                                          | ✓                         | ✓                          | ✓                                                                                               | [46]              |
| Brown macroalgae (Laminaria digitate)                           | ✓                         | ✓                                        |                           |                                          | ✓                         | ✓                          | ✓                                                                                               | [46]              |
| Brown macroalgae (Fucus spiralis)                               | ✓                         | ✓                                        |                           |                                          | ✓                         | ✓                          | ✓                                                                                               | [46]              |
| Red macroalgae (Osmundea pinnatifida)                           | ✓                         | ✓                                        |                           |                                          |                           |                            | ✓                                                                                               | [46]              |
| Red macroalgae (Grateloupia turuturu)                           | ✓                         | ✓                                        |                           |                                          |                           |                            | ✓                                                                                               | [46]              |
| Brown macroalgae (Pelvetia canaliculata)                        | ✓                         | ✓                                        |                           |                                          | ✓                         | ✓                          | ✓                                                                                               | [46]              |
| Passiflora edulis Sims shell                                    | ✓                         | ✓                                        | ✓                         | ✓                                        | ✓                         | ✓                          |                                                                                                 | [18]              |
| Passiflora tripartita var. mollissima shell                     | ✓                         | ✓                                        | ✓                         | ✓                                        | ✓                         | ✓                          | ✓                                                                                               | [48]              |

|                                              |   |   |   |   |   |   |   |            |
|----------------------------------------------|---|---|---|---|---|---|---|------------|
| Physalis peruviana calyx                     | ✓ | ✓ | ✓ | ✓ | ✓ | ✓ | ✓ | [49]       |
| Date tree skin                               | ✓ | ✓ | ✓ | ✓ | ✓ | ✓ | ✓ | [43,44]    |
| Date tree pits                               | ✓ | ✓ | ✓ | ✓ | ✓ | ✓ | ✓ | [43,44]    |
| Date tree pulp                               | ✓ | ✓ | ✓ | ✓ | ✓ | ✓ | ✓ | [43,44]    |
| Date tree cluster                            | ✓ | ✓ | ✓ | ✓ | ✓ | ✓ | ✓ | [43,44]    |
| Date tree pollen                             | ✓ | ✓ | ✓ | ✓ | ✓ | ✓ | ✓ | [43,44]    |
| Cocoa pod husk                               | ✓ | ✓ |   |   | ✓ | ✓ | ✓ | [52]       |
| Cocoa husk                                   | ✓ | ✓ |   |   | ✓ | ✓ | ✓ | [52]       |
| <i>Fruits and seeds</i>                      |   |   |   |   |   |   |   |            |
| Olive fruit                                  | ✓ | ✓ |   |   | ✓ | ✓ |   | [36]       |
| Almond kernel                                | ✓ | ✓ | ✓ | ✓ | ✓ | ✓ | ✓ | [22,29]    |
| Walnut kernel                                | ✓ | ✓ |   |   | ✓ | ✓ |   | [28]       |
| Pecan kernel                                 | ✓ | ✓ |   |   | ✓ | ✓ | ✓ | [28]       |
| Rice grain                                   | ✓ | ✓ | ✓ | ✓ | ✓ | ✓ | ✓ | [23]       |
| Pistachio kernel                             | ✓ | ✓ | ✓ | ✓ | ✓ | ✓ | ✓ | [20]       |
| Macadamia kernel                             | ✓ | ✓ |   |   | ✓ | ✓ | ✓ | [28]       |
| Cocoa bean                                   | ✓ | ✓ | ✓ | ✓ | ✓ | ✓ | ✓ | [53]       |
| Pea (Pisum sativumL.) seed                   | ✓ | ✓ | ✓ | ✓ | ✓ | ✓ | ✓ | [38,51]    |
| French beans (Phaseolus vulgarisL. seed      | ✓ | ✓ | ✓ | ✓ | ✓ | ✓ | ✓ | [51]       |
| Mangetout (Pisum sativumL. Ssp.arvense) seed | ✓ | ✓ | ✓ | ✓ | ✓ | ✓ | ✓ | [51]       |
| Coffee pulp                                  | ✓ | ✓ |   |   | ✓ | ✓ | ✓ | [52]       |
| <i>Processed Plant Foods</i>                 |   |   |   |   |   |   |   |            |
| Extra virgin olive oil                       | ✓ | ✓ | ✓ | ✓ | ✓ | ✓ | ✓ | [21,31,35] |
| Olive oil                                    |   |   | ✓ | ✓ |   |   | ✓ | [31,32]    |
| Argan oil                                    | ✓ | ✓ |   |   | ✓ |   |   | [32]       |
| Sesame oil                                   | ✓ |   |   |   | ✓ |   | ✓ | [32]       |
| Grapefruit oil                               | ✓ | ✓ |   |   | ✓ |   |   | [32]       |
| Safflower oil                                | ✓ |   |   |   | ✓ |   | ✓ | [32]       |
| Palm oil                                     |   |   |   |   | ✓ |   |   | [32]       |
| Sunflower oil                                | ✓ | ✓ | ✓ | ✓ | ✓ | ✓ | ✓ | [31]       |
| Olive (treated flesh)                        | ✓ | ✓ |   |   |   |   |   | [36]       |
| Macadamia kernel fried                       | ✓ | ✓ | ✓ | ✓ | ✓ | ✓ | ✓ | [28]       |
| Pecan kernel fried                           | ✓ | ✓ |   |   | ✓ | ✓ | ✓ | [28]       |
| Grape must                                   | ✓ |   | ✓ | ✓ |   |   | ✓ | [33]       |
| Wine                                         | ✓ |   | ✓ | ✓ | ✓ | ✓ | ✓ | [33]       |
| Dark chocolate                               | ✓ | ✓ | ✓ | ✓ | ✓ | ✓ | ✓ | [54]       |
| Sea buckthorn juice                          | ✓ | ✓ | ✓ | ✓ | ✓ | ✓ | ✓ | [34]       |

**Table S2:** Qualitative profile of phytofurans in terms of their occurrence and distribution in plant physiological part, fruits and processed plant foods.

| Plant/Food Sample                                               | <i>ent</i> -16( <i>RS</i> )-9- <i>epi</i> -ST- $\Delta^{14}$ -10-PhytoF | <i>ent</i> -9( <i>RS</i> )-12- <i>epi</i> -ST- $\Delta^{10}$ -13-PhytoF | <i>ent</i> -16( <i>RS</i> )-13- <i>epi</i> -ST- $\Delta^{14}$ -9-PhytoF | Reference         |
|-----------------------------------------------------------------|-------------------------------------------------------------------------|-------------------------------------------------------------------------|-------------------------------------------------------------------------|-------------------|
| <i>Plant Physiological Parts</i>                                |                                                                         |                                                                         |                                                                         |                   |
| <b>Wheat leaves</b>                                             | ✓                                                                       | ✓                                                                       | ✓                                                                       | <b>this study</b> |
| Cucumis melo L. leaves                                          | ✓                                                                       | ✓                                                                       |                                                                         | [42]              |
| Date tree leaves                                                | ✓                                                                       | ✓                                                                       | ✓                                                                       | [43,44]           |
| Chilean hazelnut (Gevuina avellana Mol., Proteaceae) cotyledons | ✓                                                                       | ✓                                                                       | ✓                                                                       | [47]              |
| Brown macroalgae (Ectocarpus siliculosus)                       | ✓                                                                       | ✓                                                                       | ✓                                                                       | [46]              |
| Brown macroalgae (Laminaria digitate)                           | ✓                                                                       | ✓                                                                       | ✓                                                                       | [46]              |
| Brown macroalgae (Pelvetia canaliculata)                        | ✓                                                                       |                                                                         |                                                                         | [46]              |
| Red macroalgae (Osmundea pinnatifida)                           |                                                                         |                                                                         | ✓                                                                       | [6]               |
| Red macroalgae (Grateloupia turuturu)                           | ✓                                                                       |                                                                         | ✓                                                                       | [46]              |
| Brown macroalage (Fucus spiralis)                               | ✓                                                                       | ✓                                                                       | ✓                                                                       | [46]              |
| Date tree skin                                                  | ✓                                                                       | ✓                                                                       | ✓                                                                       | [43]              |
| Date tree pits                                                  | ✓                                                                       | ✓                                                                       | ✓                                                                       | [43]              |
| Date tree pulp                                                  | ✓                                                                       | ✓                                                                       | ✓                                                                       | [43]              |
| Date tree cluster                                               | ✓                                                                       | ✓                                                                       | ✓                                                                       | [43]              |
| Date tree pollen                                                | ✓                                                                       | ✓                                                                       | ✓                                                                       | [43]              |
| Cocoa pod husk                                                  | ✓                                                                       | ✓                                                                       | ✓                                                                       | [52]              |
| Cocoa husk                                                      | ✓                                                                       | ✓                                                                       | ✓                                                                       | [52]              |
| <i>Fruits and seeds</i>                                         |                                                                         |                                                                         |                                                                         |                   |
| Flax seeds                                                      |                                                                         |                                                                         | ✓                                                                       | [19]              |
| Chia seeds                                                      |                                                                         |                                                                         | ✓                                                                       | [19]              |
| Cocoa bean                                                      | ✓                                                                       | ✓                                                                       | ✓                                                                       | [53]              |
| Pea (Pisum sativumL.)                                           | ✓                                                                       | ✓                                                                       | ✓                                                                       | [38,51]           |

|                                            |   |   |   |         |
|--------------------------------------------|---|---|---|---------|
| French beans<br>(Phaseolus vulgarisL.)     | ✓ | ✓ | ✓ | [51]    |
| Mangetout (Pisum sativumL.<br>Ssp.arvense) | ✓ | ✓ | ✓ | [51]    |
| Rice                                       | ✓ | ✓ | ✓ | [37,50] |
| Almond                                     | ✓ | ✓ | ✓ | [22]    |
| Pistachio kernels                          | ✓ | ✓ | ✓ | [20]    |
| Coffee pulp                                | ✓ | ✓ | ✓ | [52]    |
| <i>Processed Plant Foods</i>               |   |   |   |         |
| Extra virgin olive oil                     | ✓ | ✓ | ✓ | [32]    |
| Flax oil                                   | ✓ | ✓ | ✓ | [32]    |
| Argan oil                                  |   |   | ✓ | [32]    |
| Sesame oil                                 |   |   | ✓ | [32]    |
| Grapeseed oil                              |   | ✓ | ✓ | [32]    |
| Safflower oil                              |   |   | ✓ | [32]    |
| Palm oil                                   |   | ✓ | ✓ | [32]    |
| Dark chocolate                             | ✓ |   | ✓ | [54]    |
| Sea buckthorn juice                        |   | ✓ |   | [34]    |
